# Supplementary material
Source: PubMed Central journal article supplement (PMC5440012)
Supplement: DB161246SupplementaryData.pdf [file DB161246SupplementaryData.pdf]

SUPPLEMENTARY DATA

**Supplementary Figure 1.** Specificity of PPAR $\alpha$  regulation by *miR-21*. *MiR-184* mimic, *miR-31* mimic and *miR-21* mimic were separately transfected into HRMECs, and (A) protein levels of PPAR $\alpha$  were measured by Western blot analysis and (B) semi-quantified by densitometry (data are representative of 3 independent experiments. N.S., non-significant).

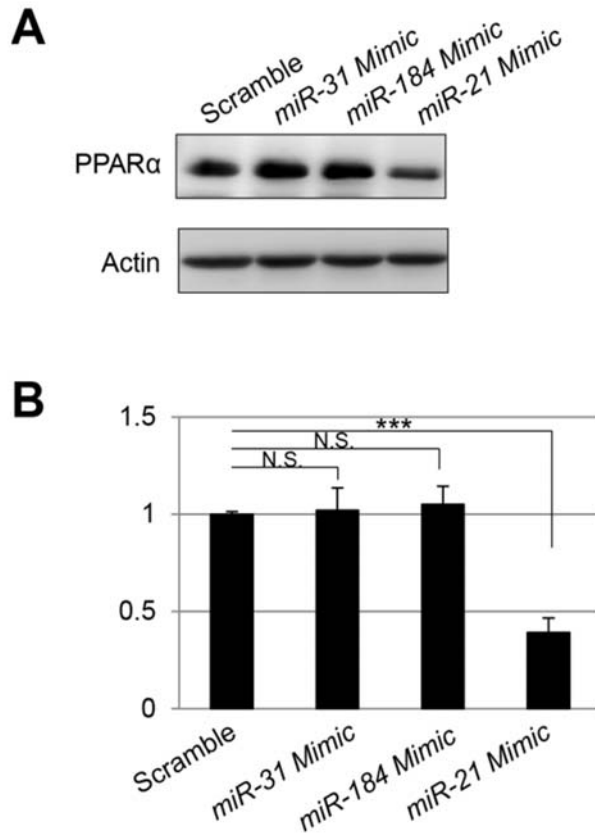

SUPPLEMENTARY DATA

**Supplementary Figure 2. *MiR-21* does not destabilize the *PPAR $\alpha$*  mRNA.** (A) *MiR-21* mimic, (B) *miR-21* inhibitor and their respective controls were separately transfected into hTERT-RPE-1 cells, and levels of the *PPAR $\alpha$*  mRNA were measured by qPCR. (C-D) Similarly, (C) *miR-21* mimic and (D) *miR-21* inhibitor were transfected into HRMECs, and levels of the *PPAR $\alpha$*  mRNA were measured by qPCR (data are representative of 3 independent experiments. N.S., non-significant).

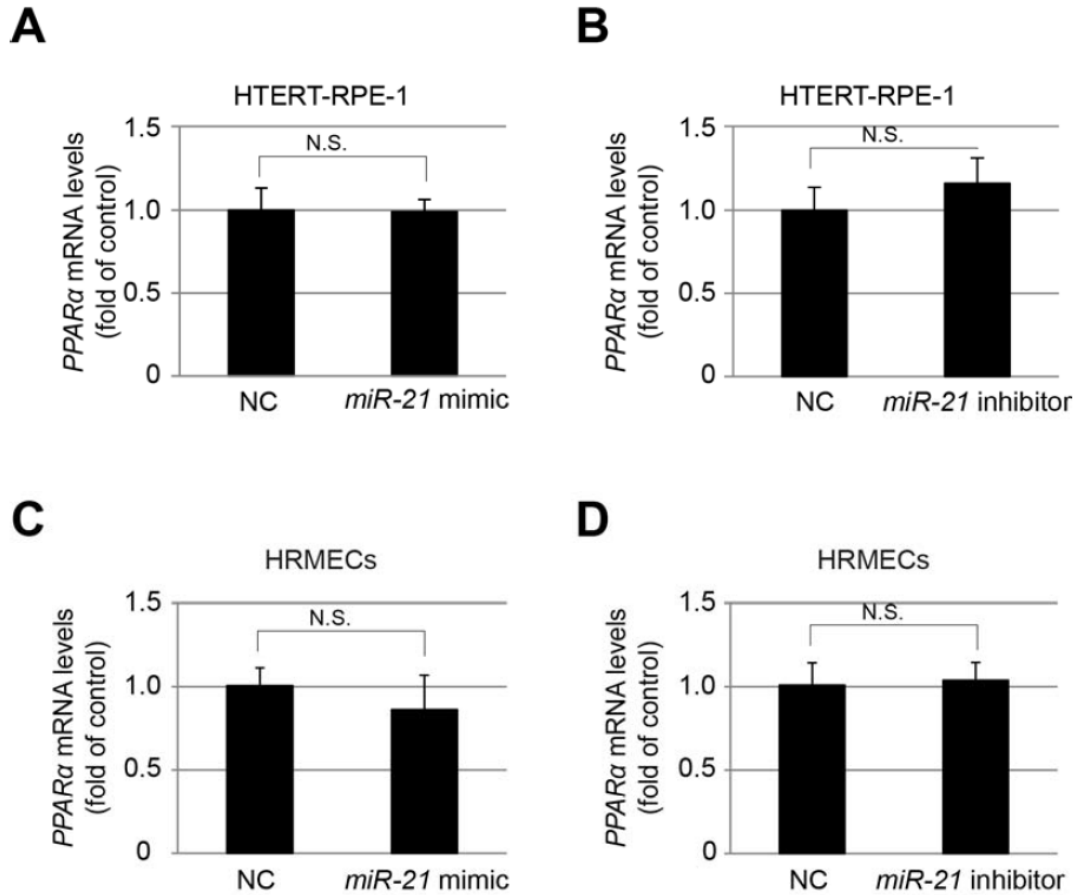

SUPPLEMENTARY DATA

**Supplementary Figure 3. Lack of vascular defects in *miR-21*<sup>-/-</sup> mice at P16.** Flat-mounted retinas of WT and *miR-21*<sup>-/-</sup> mice at age of P16 were stained with isolectin B4 (red). The retinal vessels in *miR-21*<sup>-/-</sup> mice were similar to those in WT mice (n=10). Scar bar: 1000μM.

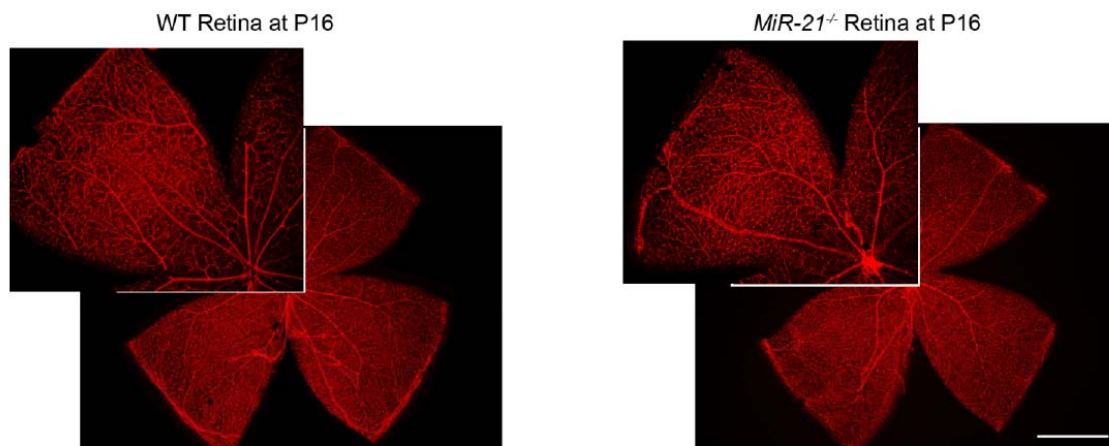

SUPPLEMENTARY DATA

**Supplementary Figure 4. No change of retinal HIF-1 $\alpha$  levels in *db/db* mice or *db/db* mice injected with *miR-21* inhibitor.** (A) Protein levels of HIF-1 $\alpha$  were measured in the retina of 6 moth-old *db/db* mice and age- and genetic matched WT controls by Western blot analysis. (B) Levels of HIF-1 $\alpha$  were quantified by densitometry (n=5, N.S.= non-significant). (C) Protein levels of HIF-1 $\alpha$  were measured in the retina of *db/db* mice injected with nanoparticles containing *miR-21* inhibitor or scramble miRNA (control). (D) Levels of HIF-1 $\alpha$  were quantified by densitometry (n=8, N.S.= non-significant)

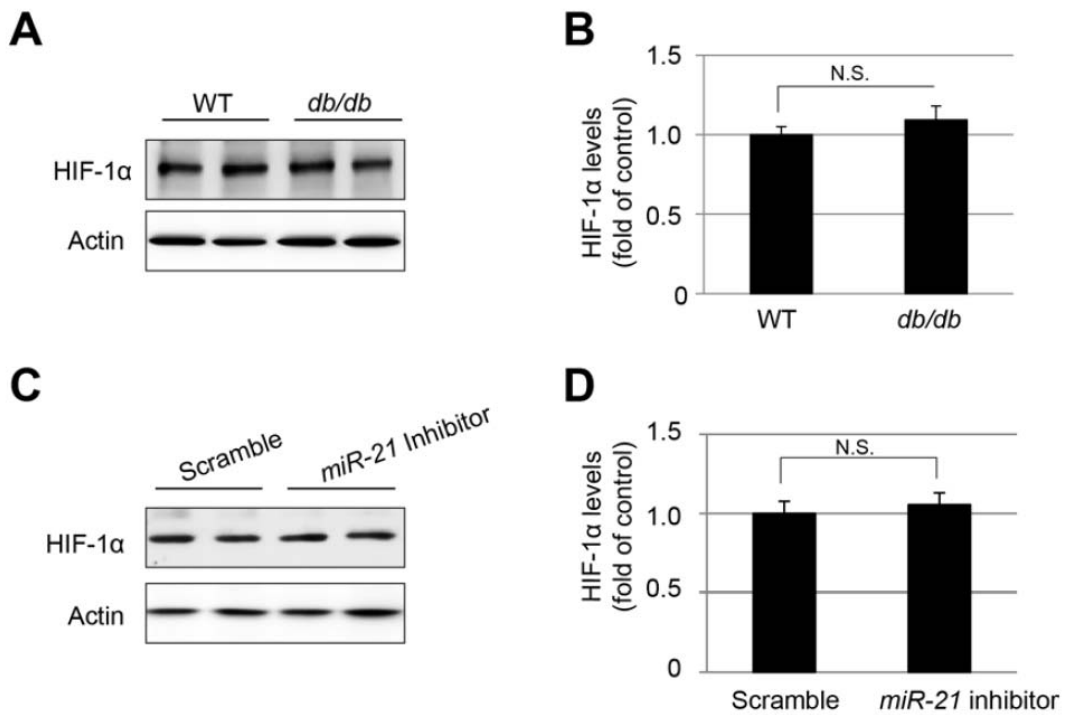

SUPPLEMENTARY DATA

**Supplementary Figure 5. Unchanged PPAR $\alpha$  levels in *miR-21*<sup>-/-</sup> mice under normal condition. (A)** Retinal levels of PPAR $\alpha$  were measured in WT and *miR-21*<sup>-/-</sup> mice by Western blot analysis. **(B)** Levels of PPAR $\alpha$  were quantified by densitometry (n=6, N.S., non-significant).

**A**

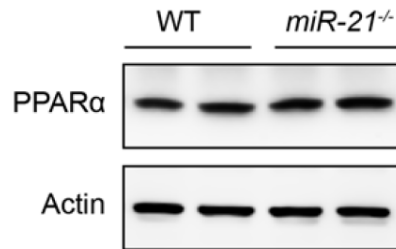

**B**

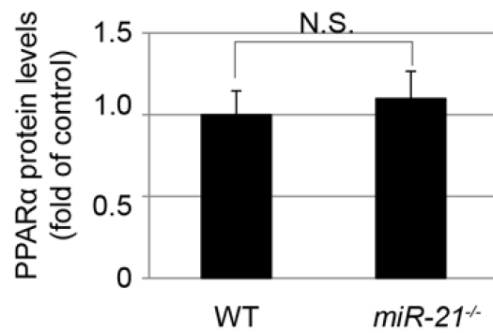

SUPPLEMENTARY DATA

**Supplementary Table 1. Up-regulated miRNAs in the miRNA microarray (*db/db* vs. WT)**

| Name                     | Fold of changes | Target 3' UTR of <i>PPARα</i> mRNA (human) | Target 3' UTR of <i>PPARα</i> mRNA (mouse) | Conserved sites in targeting both human and mouse <i>PPARα</i> mRNAs | Levels of changes can be verified by qRT-PCR |
|--------------------------|-----------------|--------------------------------------------|--------------------------------------------|----------------------------------------------------------------------|----------------------------------------------|
| <i>mmu-miR-184</i>       | 3.17            | YES                                        | NO                                         | --                                                                   |                                              |
| <i>mmu-miR-31</i>        | 1.99            | YES                                        | NO                                         | --                                                                   |                                              |
| <i>mmu-miR-379</i>       | 1.72            | YES                                        | NO                                         | --                                                                   |                                              |
| <i>mmu-miR-322</i>       | 1.64            | NO                                         | NO                                         | --                                                                   |                                              |
| <i>mmu-miR-132</i>       | 1.39            | YES                                        | NO                                         | --                                                                   |                                              |
| <i>mmu-miR-376b*</i>     | 1.34            | YES                                        | YES                                        | NO                                                                   |                                              |
| <i>mmu-miR-342-3p</i>    | 1.33            | NO                                         | YES                                        | --                                                                   |                                              |
| <i>mmu-miR-483</i>       | 1.30            | YES                                        | NO                                         | --                                                                   |                                              |
| <i>mmu-miR-15b</i>       | 1.26            | NO                                         | NO                                         | --                                                                   |                                              |
| <i>mmu-miR-195</i>       | 1.23            | NO                                         | NO                                         | --                                                                   |                                              |
| <i>mmu-miR-9*</i>        | 1.22            | YES                                        | NO                                         | --                                                                   |                                              |
| <i>mmu-let-7g</i>        | 1.22            | NO                                         | NO                                         | --                                                                   |                                              |
| <i>mmu-miR-26a</i>       | 1.23            | YES                                        | NO                                         | --                                                                   |                                              |
| <i>mmu-miR-146b</i>      | 1.20            | NO                                         | NO                                         | --                                                                   |                                              |
| <i>mmu-miR-384-5p</i>    | 1.14            | NO                                         | NO                                         | --                                                                   |                                              |
| <i>mmu-miR-361</i>       | 1.12            | NO                                         | YES                                        | --                                                                   |                                              |
| <i>mmu-miR-128</i>       | 1.12            | YES                                        | YES                                        | YES                                                                  | NO                                           |
| <i>mmu-miR-183*</i>      | 1.10            | NO                                         | NO                                         | --                                                                   |                                              |
| <b><i>mmu-miR-21</i></b> | <b>1.07</b>     | <b>YES</b>                                 | <b>YES</b>                                 | <b>YES</b>                                                           | <b>YES</b>                                   |
| <i>mmu-miR-1839-5p</i>   | 1.06            | NO                                         | NO                                         | --                                                                   |                                              |
| <i>mmu-miR-151-5p</i>    | 1.05            | NO                                         | NO                                         | --                                                                   |                                              |
